# Supplementary material
Source: publisher figshare collection journal article supplement (https://acs.figshare.com/ndownloader/files/3958045)
Supplement: Supplementary file 1 [file 3958045]

# Cooperativity and structural relaxations in PVDF/PMMA blends in presence of MWNTs: an assessment through SAXS and dielectric spectroscopy

Maya Sharma<sup>1</sup>, Giridhar Madras<sup>1</sup>, Suryasarathi Bose<sup>2\*</sup>

<sup>1</sup> Center for Nano Science and Engineering, Indian Institute of Science, Bangalore-560012, India

<sup>2</sup> Department of Materials Engineering, Indian Institute of Science, Bangalore-560012, India.

## Characterization

Fourier transform infrared (FTIR) spectroscopy was carried out using Perkin- Elmer GX in the range of 4000-400  $\text{cm}^{-1}$  using a resolution of 4  $\text{cm}^{-1}$ .

Wide angle X-ray diffraction (WAXRD) studies were analyzed using PANalytical Xpert pro to analyze the structure of PVDF/PMMA blends using a  $\text{Cu K}\alpha$  radiation (1.54 Å, 40 k eV) and in the  $2\theta$  range of 5-50° with a scan rate of 0.04° s<sup>-1</sup>.

## Results and Discussion

### *MWNTs induced $\beta$ phase in PVDF*

We systematically investigated the crystal structure of the blends in presence of different MWNTs by FTIR and WAXD. Interestingly, the control blends and blends with COOH-MWNTs exhibited only the  $\alpha$  crystal form whereas, the blends with  $\text{NH}_2$ - and p-MWNTs revealed both the crystal forms ( $\alpha$  and  $\beta$ ). FTIR spectra is shown in Figure S1 and the magnified spectra in the region 400-1600  $\text{cm}^{-1}$  is shown in S2. The characteristic peaks at 512, 600, 840 and 1279  $\text{cm}^{-1}$  represent  $\beta$ -phase in the blends. The transmission peaks at 410, 530, 615, 764, 796, 851, 974, 1154, 1406  $\text{cm}^{-1}$  represent  $\alpha$ -phase of 80/20 PVDF/PMMA blends. We can clearly see that only in the blend with  $\text{NH}_2$ -MWNTs and p-MWNTs,  $\beta$ -phase is present. Neat blend as well as blend with COOH-MWNTs show only  $\alpha$ -phase of PVDF.

Further presence of  $\beta$ -phase in the blends is also supported by WAXD and is shown in Figure S3. Crystalline peaks at  $2\theta$  values of 17.8°, 18.48°, 20.1°, and 26.62° corresponds to  $\alpha$  (100),  $\alpha$  (020),  $\alpha$  (110) and  $\alpha$  (021) respectively. In the blend with  $\text{NH}_2$ -MWNTs and p-MWNTs, one additional shoulder is obtained at  $2\theta = 20.6^\circ$  and  $20.7^\circ$  corresponds to the  $\beta$  (200),  $\beta$  (110) respectively.

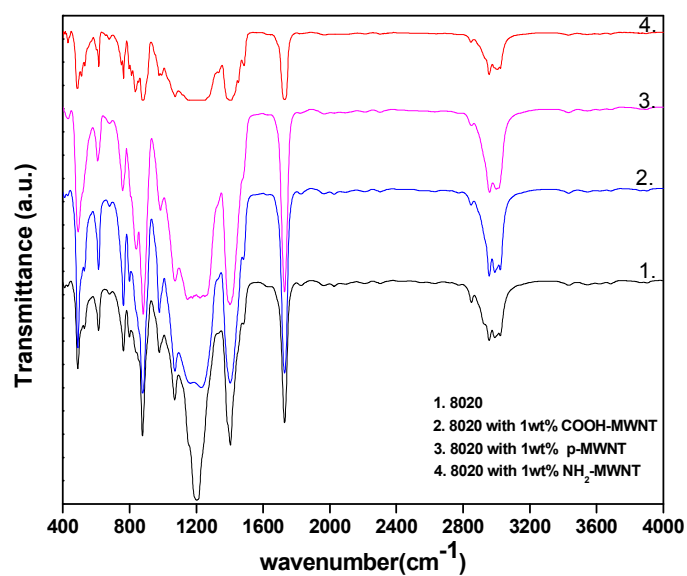

**Figure S1: FTIR spectra for PVDF/PMMA blends and with different MWNTs**

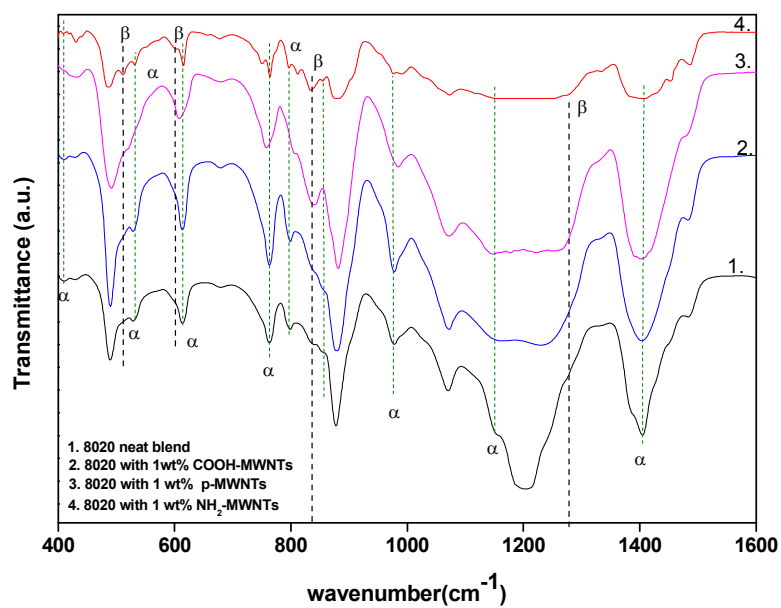

**Figure S2: Magnified FTIR spectra in the region 400-1600 cm<sup>-1</sup>**

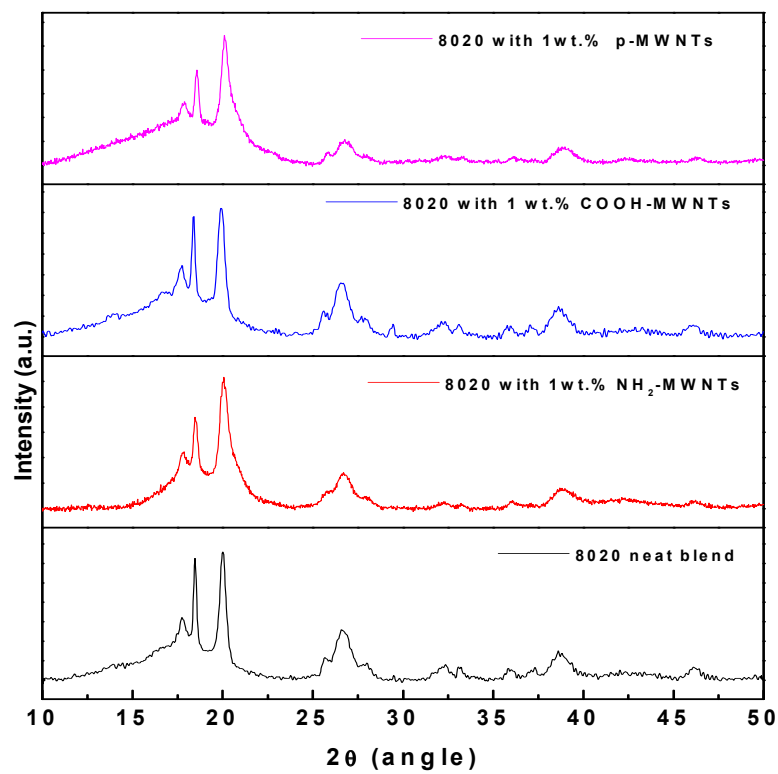

**Figure S3: WAXD patterns for neat blends and blends with different functionalized MWNTs.**
